# Supplementary material for: Occurrence, Antimicrobial Resistance, and Molecular Characterization of Campylobacter spp. in Intensive Pig Production in South Africa
Source: PubMed Central journal article supplement (PMC8067824; doi:10.3390/pathogens10040439), 2021-04-07
Supplement: pathogens-10-00439-s001.pdf [file pathogens-10-00439-s001.pdf]

## Supplementary Material

# Occurrence, Antimicrobial Resistance, and Molecular Characterisation of *Campylobacter* Spp. in Intensive Pig Production in South Africa

Viwe Sithole<sup>1</sup>, Daniel Gyamfi Amoako<sup>1,2\*</sup>, Akebe Luther King Abia<sup>1\*</sup>, Keith Perrett<sup>3</sup>, Linda A. Bester<sup>2</sup> and Sabiha Y. Essack<sup>1</sup>

<sup>1</sup> Antimicrobial Research Unit, College of Health Sciences, University of KwaZulu-Natal, Durban 4000, South Africa; [viwevisa@gmail.com](mailto:viwevisa@gmail.com) (V.S.); [amoakodg@gmail.com](mailto:amoakodg@gmail.com) (D.G.A.); [lutherkinga@yahoo.fr](mailto:lutherkinga@yahoo.fr) (A.L.K.A.); [essacks@ukzn.ac.za](mailto:essacks@ukzn.ac.za) (S.Y.E.)

<sup>2</sup> Biomedical Resource Unit, College of Health Sciences, University of KwaZulu-Natal, Durban 4000, South Africa; [besterl@ukzn.ac.za](mailto:besterl@ukzn.ac.za) (L.A.B.)

<sup>3</sup> Epidemiology Section, KwaZulu-Natal Agriculture & Rural Development-Veterinary Service, Pietermaritzburg 3201, South Africa; [keith.perrett@kzndard.gov.za](mailto:keith.perrett@kzndard.gov.za) (K.P.)

\* Correspondence: [amoakodg@gmail.com](mailto:amoakodg@gmail.com) (D.G.A.), Tel.: +27(0)843308957; ORCID: 000-0003-3551-3458; [lutherkinga@yahoo.fr](mailto:lutherkinga@yahoo.fr) (A.L.K.A.), Tel.: +27(0)734403343, ORCID: 000-0002-5194-2810

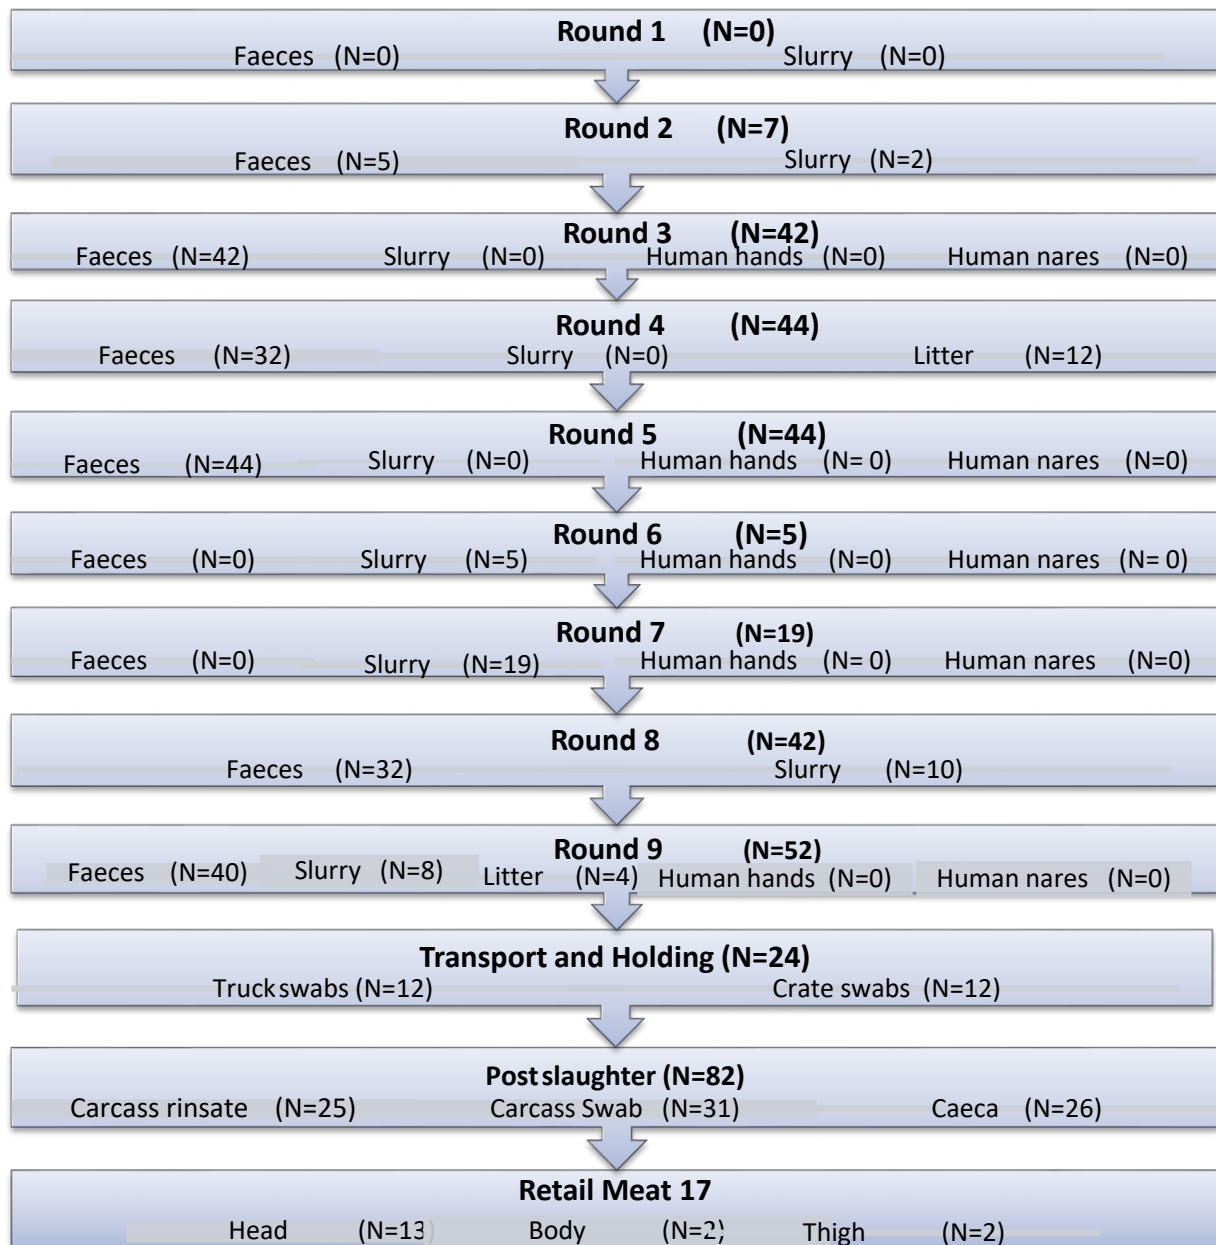

**Figure S1:** Sampling framework. “N” denotes the number of confirmed *Campylobacter spp.* at each sampling point and source.

**Table S1:** Primers used for confirmation of *Campylobacter* to genus and species level.

| <b>Target gene</b> | <b>Primer Sequence (5' – 3')</b>                    | <b>Product Size (bp)</b> | <b>Annealing Temperature (°C)</b> | <b>References</b> |
|--------------------|-----------------------------------------------------|--------------------------|-----------------------------------|-------------------|
| <i>Asp</i>         | F-GGTATGATTTCTACAAAGCGAG<br>R-ATAAAAGACTATCGTCGCGTG | 500                      | 60                                | [4]               |
| <i>hipO</i>        | F-GAAGAGGGTTTGGGTGGTG<br>R-AGCTAGCTTCGCATAATAACTTG  | 735                      | 66                                | [4]               |
| <i>16S rRNA</i>    | F-GGATGACACTTTTCGGAGC<br>R-CATTGTAGCACGTGTGTC       | 816                      | 58                                | [4]               |

**Table S2:** Primers used for the detection of antibiotic resistance genes.

| Target gene                       | Primer Sequence (5' – 3')                             | Product Size (bp) | Annealing Temperature( °C) | References |
|-----------------------------------|-------------------------------------------------------|-------------------|----------------------------|------------|
| 23S rRNA at position 2074         | F-TTAGCTAATGTTGCCCGTACCG<br>R-AGTAAAGGTCCACGGGGTCTCG  | 485               | 59                         | [29]       |
| 23S rRNA at position 2075         | F-TTAGCTAATGTTGCCCGTACCG<br>R-TAGTAAAGGTCCACGGGGTCTCG | 486               | 59                         | [29]       |
| <i>gyrA</i> ( <i>C. coli</i> )    | F-GAAGAATTTTATATGCTATG<br>R-TCAGTATAAC GCATCGCAGC     | 235               | 53                         | [4]        |
| <i>gyrA</i> ( <i>C. jejeuni</i> ) | F-ACGCAAGAGAGATGGTT<br>R-TCAGTATAACGCATCGCAGC         | 270               | 45                         | [4]        |
| <i>cmeB</i>                       | F-GACGTAATGAAGGAGAGCCA<br>R-CTGATCCACTCCAGCTATG       | 1166              | 50                         | [29]       |
| <i>tet(O)</i>                     | F-GGCGTTTTGTTTATGTGCG<br>R-ATGGACAACCCGACAGAAGC       | 559               | 49                         | [4]        |
| <i>blaOXA-61</i>                  | F-AGAGTATAATACAAGCG<br>R-TAGTGAGTTGTCAAGCC            | 372               | 54                         | [4]        |

**Table S3:** Primers used for the detection of virulence genes.

| Target gene | Primer Sequence (5' – 3')                                | Product Size (bp) | Annealing Temperature (°C) | References |
|-------------|----------------------------------------------------------|-------------------|----------------------------|------------|
| <i>cadF</i> | F-TTGAAGGTAATTTAGATATG<br>R-CTAATACCTAAAGTTGAAAC         | 400               | 43                         | [30]       |
| <i>ciaB</i> | F-TGCGAGATTTTTCGAGAATG<br>R-TGCCCGCCTTAGAACTTACA         | 527               | 54                         |            |
| <i>dnaJ</i> | F-ATTGATTTTGCTGCGGGTAG<br>R-ATCCGCAAAAGCTTCAAAAA         | 177               | 50                         |            |
| <i>pldA</i> | F-AAGAGTGAGGCGAAATTCCA<br>R-GCAAGATGGCAGGATTATCA         | 385               | 46                         |            |
| <i>cdtA</i> | F-CCTTGTGATGCAAGCAATC<br>R-ACACTCCATTTGCTTTCTG           | 370               | 49                         |            |
| <i>cdtB</i> | F-GTTAAAATCCCCTGCTATCAACCA<br>R-GTTGGCACTTGGAATTTGCAAGGC | 495               | 51                         |            |
| <i>cdtC</i> | F-CGATGAGTTAAAACAAAAAGATA<br>R-TTGGCATTATAGAAAATACAGTT   | 182               | 48                         |            |

**Table S4:** Antibiotic resistance (%) of *C. coli* ( $n = 277$ ) across the farm-to-fork continuum.

| Antibiotic Panel | Farm   |        |        | Transport        | Abattoir        |                    |        | Retail      |
|------------------|--------|--------|--------|------------------|-----------------|--------------------|--------|-------------|
|                  | Faeces | Litter | Slurry | Truck/<br>Crates | Carcass<br>Swab | Carcass<br>Rinsate | Caecal | Retail Meat |
| Ampicillin       | 34%    | 2%     | 4%     | 5%               | 8%              | 8%                 | 7%     | 1%          |
| Nalidixic acid   | 13%    | 1%     | 6%     | 0%               | 3%              | 4%                 | 0%     | 0%          |
| Ciprofloxacin    | 26%    | 3%     | 8%     | 2%               | 3%              | 4%                 | 5%     | 3%          |
| Erythromycin     | 46%    | 5%     | 6%     | 6%               | 8%              | 8%                 | 7%     | 4%          |
| Tetracycline     | 45%    | 6%     | 10%    | 6%               | 1%              | 3%                 | 7%     | 3%          |
| Gentamycin       | 10%    | 0%     | 2%     | 0%               | 0%              | 0%                 | 0%     | 0%          |
| Streptomycin     | 40%    | 4%     | 9%     | 6%               | 8%              | 8%                 | 7%     | 4%          |

**Table S5:** Antibiotic resistance (%) of *C. jejuni* ( $n = 67$ ) across the farm-to-fork continuum.

| Antibiotic Panel | Farm   |        |        | Transport        | Abattoir        |                    |        | Retail         |
|------------------|--------|--------|--------|------------------|-----------------|--------------------|--------|----------------|
|                  | Faeces | Litter | Slurry | Truck/<br>Crates | Carcass<br>Swab | Carcass<br>Rinsate | Caecal | Retail<br>Meat |
| Ampicillin       | 57%    | 0%     | 13%    | 6%               | 0%              | 2%                 | 3%     | 3%             |
| Nalidixic acid   | 16%    | 0%     | 8%     | 0%               | 2%              | 2%                 | 0%     | 0%             |
| Ciprofloxacin    | 43%    | 0%     | 13%    | 0%               | 2%              | 3%                 | 2%     | 5%             |
| Erythromycin     | 67%    | 0%     | 13%    | 6%               | 2%              | 3%                 | 3%     | 5%             |
| Tetracycline     | 67%    | 0%     | 13%    | 6%               | 2%              | 2%                 | 3%     | 3%             |
| Gentamycin       | 8%     | 0%     | 3%     | 0%               | 2%              | 0%                 | 0%     | 0%             |
| Streptomycin     | 63%    | 0%     | 13%    | 6%               | 2%              | 2%                 | 3%     | 5%             |

**Table S6:** Prevalence (%) of virulence genes detected in *C. coli* ( $n = 277$ ) across the farm-to-fork continuum

| Virulence genes | Farm   |        |        | Transport        | Abattoir     |                 |        | Retail      |
|-----------------|--------|--------|--------|------------------|--------------|-----------------|--------|-------------|
|                 | Faeces | Litter | Slurry | Truck and Crates | Carcass Swab | Carcass Rinsate | Ceecal | Retail Meat |
| <i>cadF</i>     | 2%     | 0%     | 3%     | 0%               | 1%           | 1%              | 0%     | 0%          |
| <i>dnaJ</i>     | 26%    | 6%     | 8%     | 3%               | 7%           | 8%              | 1%     | 4%          |
| <i>ciaB</i>     | 23%    | 2%     | 6%     | 3%               | 7%           | 4%              | 4%     | 2%          |
| <i>pldA</i>     | 11%    | 3%     | 1%     | 0%               | 0%           | 0%              | 0%     | 1%          |
| <i>cdtA</i>     | 32%    | 6%     | 7%     | 3%               | 7%           | 6%              | 3%     | 1%          |
| <i>cdtB</i>     | 17%    | 1%     | 0%     | 1%               | 1%           | 1%              | 1%     | 1%          |
| <i>cdtC</i>     | 21%    | 2%     | 5%     | 5%               | 8%           | 5%              | 5%     | 2%          |



**Table S7:** Prevalence (%) of virulence genes detected in *C. jejuni* (n = 67) across the farm-to-fork continuum.

| Virulence genes | Farm   |        |        | Transport        | Abattoir     |                 |        | Retail      |
|-----------------|--------|--------|--------|------------------|--------------|-----------------|--------|-------------|
|                 | Faeces | Litter | Slurry | Transport Crates | Carcass Swab | Carcass Rinsate | Ceacal | Retail Meat |
| <i>cadF</i>     | 0%     | 0%     | 0%     | 0%               | 1%           | 0%              | 0%     | 0%          |
| <i>dnaJ</i>     | 51%    | 0%     | 7%     | 1%               | 1%           | 0%              | 0%     | 3%          |
| <i>ciaB</i>     | 37%    | 0%     | 6%     | 3%               | 1%           | 1%              | 1%     | 0%          |
| <i>pldA</i>     | 22%    | 0%     | 4%     | 0%               | 0%           | 0%              | 0%     | 0%          |
| <i>cdtA</i>     | 58%    | 0%     | 13%    | 3%               | 1%           | 1%              | 3%     | 0%          |
| <i>cdtB</i>     | 7%     | 0%     | 1%     | 0%               | 1%           | 0%              | 0%     | 1%          |
| <i>cdtC</i>     | 27%    | 0%     | 7%     | 3%               | 1%           | 1%              | 3%     | 3%          |
